# Supplementary material for: Internalization of (bis)phosphonate-modified cellulose nanocrystals by human osteoblast cells
Source: Springer Nature journal article supplement (doi:10.1007/s10570-017-1432-5), 2017-08-09
Supplement: MOESM1 [file 14212144]

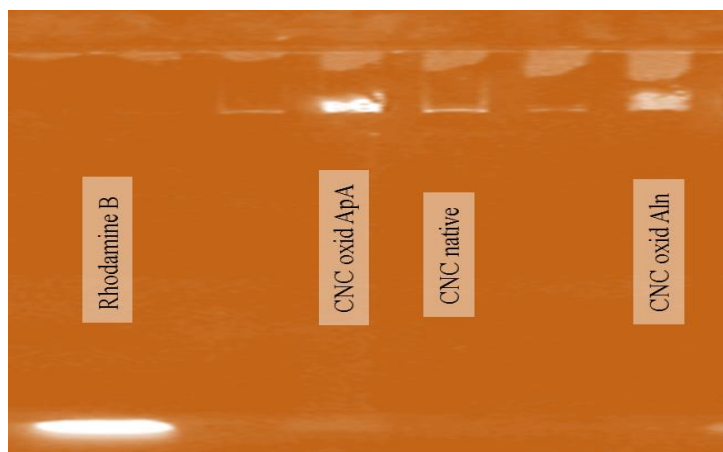

**Figure S1.** SDS-PAGE for native and ApA/Aln-modified and RBITC-labelled CNCs. The RBITC was included as a reference for free-dye migration track.

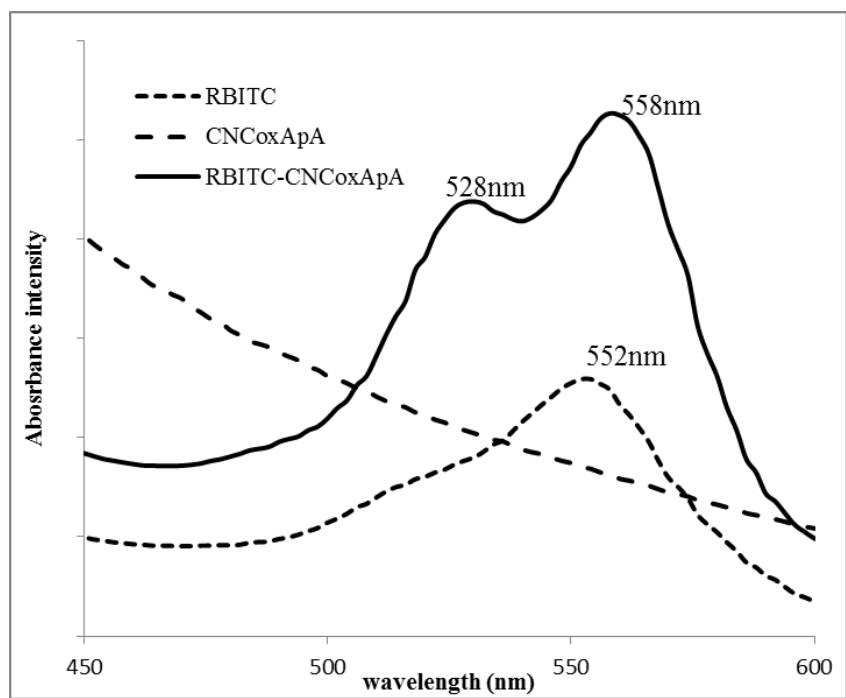

**Figure S2.** UV-VIS absorbance spectra of native RBITC, ApA-modified (CNCoxApA) and RBITC-labelled (RBITC-CNCoxApA) CNCs.

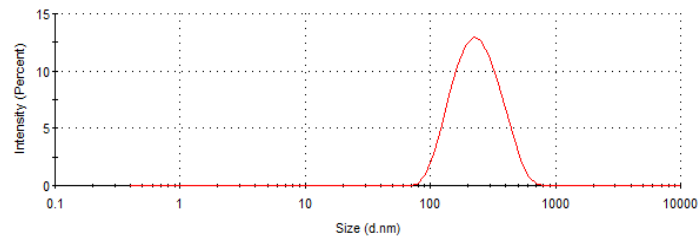

a)

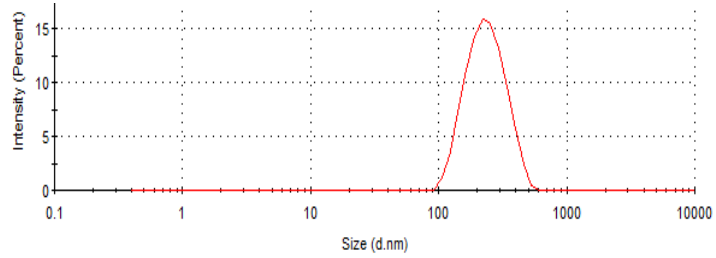

b)

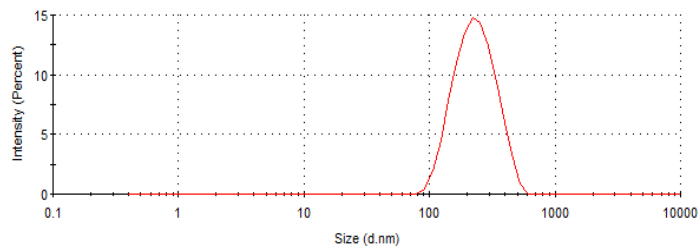

c)

**Figure S3.** DLS data for size distribution by intensity of a) native, b) oxidised (CNCox) and c) ApA-modified (CNCoxApa) CNCs, being presented by intensity measurement.

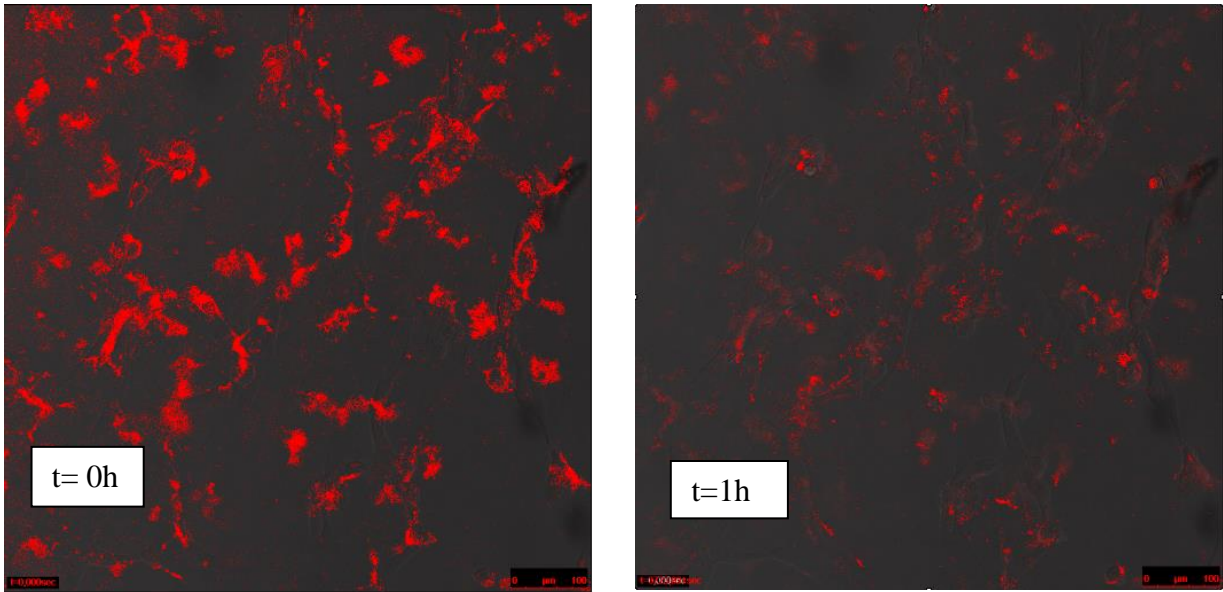

a)

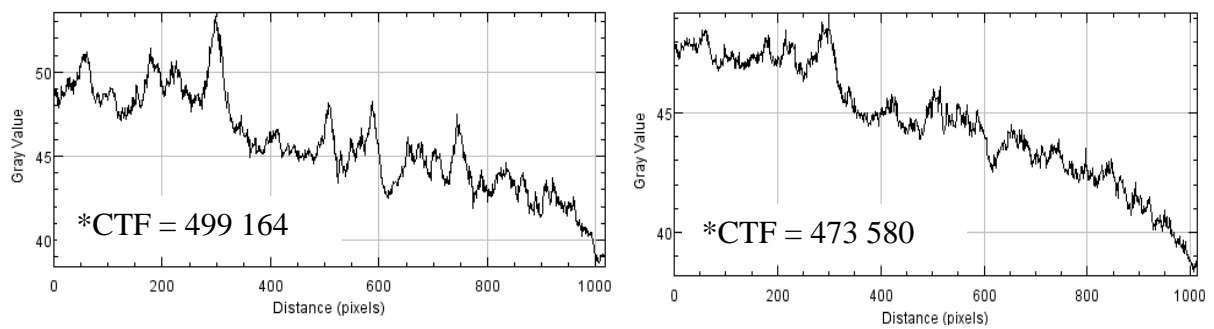

b)

\*Calculated total fluorescence (CTF) = Integrated Density – (Image Area x Mean fluorescence of background readings).

**Figure S4. a)** Micrographs from confocal fluorescent microscopy, being taken at beginning ( $t= 0$ ) and after 1 h of incubation ( $t=1$ ) for native CNC with osteoblasts. For comparison, same z-stack position is used in both images, obtained from red (fluorescent) channel (without visible cells). **b)** The plot profiles (for all image area, excluding the scale bar) of fluorescence intensity (y-axis) are presented below for the respective images.
